# Supplementary material
Source: PubMed Central journal article supplement (PMC4464949)
Supplement: NIHMS664590-supplement-2.pdf [file NIHMS664590-supplement-2.pdf]

**Supplementary Table 1. MDS- and isogenic normal iPSC lines used in this study.**

| Patient | Diagnosis  | BM FISH          | Starting cells | Del(7q)-MDS-iPSC lines        | Normal iPSC lines                      |
|---------|------------|------------------|----------------|-------------------------------|----------------------------------------|
| #2      | MDS (RAEB) | del(7q) in 72.5% | BMMCs          | MDS-2.13<br>MDS-2.A3*         | N-2.8<br>N-2.12<br>N-2.A2*<br>N-2.A11* |
| #3      | MDS (RAEB) | del(7q) in 99%   | BMMCs          | MDS-3.1<br>MDS-3.4<br>MDS-3.5 | N-3.10                                 |

All iPSC lines used in this study. The lines MDS-2.A3, N-2.A2 and N-2.A11, marked with an asterisk, were derived in a separate reprogramming experiment than lines MDS-2.13, N-2.8 and N-2.12 (see Supplementary Table 2). (RAEB: Refractory anemia with excess blasts, according to the FAB classification)

**Supplementary Table 2. All reprogramming experiments.**

| Reprogramming experiment | Patient | Total colonies picked | Colonies tested for chr7q copy number by qPCR | Colonies expanded                                        | iPSC lines studied                  |
|--------------------------|---------|-----------------------|-----------------------------------------------|----------------------------------------------------------|-------------------------------------|
| 1st                      | #2      | 11                    | 0                                             | 1 del(7q) and 10 normal <sup>a</sup>                     | 1 del(7q) and 2 normal <sup>c</sup> |
| 2nd                      | #3      | 16                    | 15 del(7q) and 1 normal                       | 9 del(7q) <sup>b</sup> and 1 normal                      | 3 del(7q) and 1 normal <sup>c</sup> |
| 3rd                      | #2      | >100                  | 17 del(7q) and 10 normal <sup>d</sup>         | 1 del(7q), 6 normal and 4 del(7q) partially reprogrammed | 1 del(7q) and 2 normal <sup>c</sup> |

Details of the 3 reprogramming experiments performed to generate the iPSC lines shown in Supplementary Table 1.

<sup>a</sup>In this first experiment, chr7q dosage was determined after cell expansion by karyotyping. (These lines subsequently served as one-copy and two-copy controls to establish the qPCR assay.) One pair of the 10 normal lines was found to harbor the same vector integrations (N-2.1 and N-2.8 in Supplementary Fig. 1b), therefore the number of normal lines derived from different starting cells is 9.

<sup>b</sup>Two pairs of lines were found to harbor the same vector integrations (MDS-3.1 and MDS-3.2 in Supplementary Fig. 1b and one more pair not shown), therefore the number of del(7q) lines derived from different starting cells is 7.

<sup>c</sup>These lines are listed in Supplementary Table 1.

<sup>d</sup>All but one del(7q) clones formed colonies with partially reprogrammed morphology.

**Supplementary Table 3. Isogenicity of normal and MDS-iPSCs.**

| Marker     | N-2.12 |      | MDS-2.13 |      | N-3.10 |    | MDS-3.1 |    |
|------------|--------|------|----------|------|--------|----|---------|----|
|            | X      | Y    | X        | Y    | X      | Y  | X       | Y  |
| Amelogenin | X      | Y    | X        | Y    | X      | Y  | X       | Y  |
| CSF1PO     | 11     |      | 11       |      | ND     | ND | ND      | ND |
| D13S317    | 11     |      | 11       |      | 8      | 12 | 8       | 12 |
| D16S539    | 11     | 13   | 11       | 13   | ND     | ND | ND      | ND |
| D18S51     | 14     | 16   | ND       | ND   | 13     | 18 | 13      | 18 |
| D19S433    | 13     | 15   | 13       | 15   | ND     | ND | ND      | ND |
| D21S11     | 29     | 32.2 | 29       | 32.2 | 28     | 30 | 28      | 30 |
| D2S1338    | 16     | 23   | 16       | 23   | ND     | ND | ND      | ND |
| D3S1358    | 14     | 15   | 14       | 15   | 14     | 15 | 14      | 15 |
| D5S818     | 12     | 13   | 12       | 13   | 11     |    | 11      |    |
| D7S820     | 10     | 12   | 10       | 12   | 9      | 8  | 9       |    |
| D8S1179    | 12     | 15   | 12       | 15   | 12     | 15 | 12      | 15 |
| FGA        | 23     |      | 23       |      | 21     | 23 | 21      | 23 |
| TH01       | 6      | 9.3  | 6        | 9.3  | ND     | ND | ND      | ND |
| TPOX       | 8      | 10   | 8        | 10   | ND     | ND | ND      | ND |
| vWA        | 17     |      | 17       |      | 16     | 18 | 16      | 18 |

DNA fingerprinting with CODIS markers in one normal (N-) and one MDS- iPSC line from patients #2 and #3, confirming the common genetic background. (Marker D7S820 is located in band q21.11 of chromosome 7, which is encompassed by the deletion in patient #3, but not in patient #2).

**Supplementary Table 5. Coordinates of the chr7q deletion in the MDS-2.A3 iPSC line, before and after spontaneous correction.**

---

| <b>MDS-2.A3</b>          |                           |
|--------------------------|---------------------------|
| Deletion 7q21.2 - 7q36.2 | 92,782,520 - 154,384,589  |
| Deletion 7q36.2 - 7q36.3 | 154,401,554 - 159,128,530 |

---

| <b>MDS-2.A3C</b>         |                           |
|--------------------------|---------------------------|
| Deletion 7q21.3 - 7q21.3 | 96,205,654 - 97,516,805   |
| Deletion 7q21.3 - 7q22.1 | 97,598,077 - 99,844,739   |
| Deletion 7q22.1 - 7q22.1 | 99,938,082 - 100,322,721  |
| Deletion 7q22.1 - 7q32.3 | 100,341,390 - 131,706,336 |

---

Genomic coordinates (human genome assembly hg19) of the chromosome 7 deletions in MDS-iPSC line MDS-2.A3 before and after (MDS-2.A3C) spontaneous compensation for chromosome 7q dosage (shown in Fig. 3h). The median probe spacing of the tiling array used was 795 bp.

**Supplementary Table 6. Coordinates of the engineered chromosomal deletions.**

|                                 |                          |
|---------------------------------|--------------------------|
| <b>N-2.12-D-Cre10</b>           |                          |
| Amplification 7p22.3 - 7p14.3   | 41,605 - 30,750,671      |
| Deletion 7p13 - 7p11.2          | 44,704,157 - 56,473,923  |
| Deletion 7p11.2 - 7q36.3        | 57,654,583 - 159,128,530 |
| <b>N-2.12-D-Cre32</b>           |                          |
| Amplification 7p22.3 - 7p14.3   | 41,605 - 30,750,671      |
| Deletion 7p13 - 7p11.2          | 44,704,157 - 56,473,923  |
| Deletion 7p11.2 - 7q36.3        | 57,685,793 - 159,128,530 |
| <b>N-2.12-D-2Cre4</b>           |                          |
| Amplification 7p22.3 - 7p11.2   | 41,605 - 57,685,793      |
| Deletion 7q11.21 - 7q36.3       | 61,943,112 - 159,128,530 |
| <b>N-2.12-D-8Cre21</b>          |                          |
| Deletion 7q11.21 - 7q36.3       | 62,001,073 - 159,128,530 |
| <b>N-2.12-D-8Cre23</b>          |                          |
| Amplification 7p22.3 - 7p15.3   | 41,605 - 23,018,094      |
| Amplification 7q11.21 - 7q11.22 | 61,979,253 - 68,955,029  |
| Deletion 7q11.22 - 7q36.3       | 68,955,029 - 159,128,530 |
| <b>N-2.12-D-Cre44</b>           |                          |
| Deletion 7p12.1                 | 51,128,908 - 53,480,653  |
| Deletion 7q11.21 - 7q31.1       | 64,839,001 - 112,901,029 |
| <b>N-2.12-D-6Cre6</b>           |                          |
| Deletion 7q11.1 - 7q31.1        | 61,075,538 - 112,920,418 |
| <b>H1-D-Cre1</b>                |                          |
| Deletion 7q11.21 - 7q36.3       | 62,436,296 - 159,128,530 |
| <b>H1-D-2Cre6</b>               |                          |
| Deletion 7q21.11 - 7q36.1       | 83,091,961 - 152,127,281 |
| <b>H1-D-Cre7</b>                |                          |
| Deletion 7q21.3 - 7q36.3        | 92,859,256 - 159,128,530 |

Genomic coordinates (human genome assembly hg19) of hemizygous chr7q deletions engineered in hPSC clones (shown in Fig. 4b). The median probe spacing of the tiling array used was 795 bp.

**Supplementary Table 9. Screening experiments.**

| <b>TRANSDUCTION</b> | <b>CELL LINE</b> | <b>LIBRARY BATCH</b> | <b>%GFP<sup>+</sup></b> | <b>SCREENING EXPERIMENT</b>                              |
|---------------------|------------------|----------------------|-------------------------|----------------------------------------------------------|
| #1                  | MDS-2.13 p23+13  | #1, low MOI          | 30%                     | None (due to library gene silencing)                     |
| #2                  | MDS-2.13 p23+13  | #1, high MOI         | 65%                     | #2A, #2B                                                 |
| #3                  | MDS-2.13 p23+20  | #1                   | 100%                    | None                                                     |
| #4                  | MDS-2.13 p23+21  | #1                   | 70%                     | None (due to spontaneous conversion to diploid 7q state) |
| #5                  | MDS-2.13 p23+21  | #1                   | 0%                      | None (due to library gene silencing)                     |
| #6                  | MDS-2.13 p23+41  | #2                   | 73.60%                  | #6A, #6B                                                 |
| #7                  | MDS-2.13 p23+41  | #2                   | 69.30%                  | #7                                                       |
| #8                  | MDS-2.13 p23+39  | #3                   | 86.70%                  | #8                                                       |
| #9                  | MDS-2.13 p23+39  | #3                   | 83.10%                  | #9                                                       |
| #10                 | MDS-2.A3 p27     | #1, low MOI          | 40%                     | None                                                     |
| #11                 | MDS-2.A3 p27     | #1, high MOI         | 62.50%                  | None                                                     |
| #12                 | MDS-2.A3 p27     | #1, high MOI         | 72%                     | #12                                                      |

List of all independent transductions and screening experiments.

**Supplementary Table 10. Library representation and reproducibility of screen readout.**

| #4A   |         |                  | #4B   |         |                  |
|-------|---------|------------------|-------|---------|------------------|
| Reads | Barcode | % Representation | Reads | Barcode | % Representation |
| 0     | AGAA    | 0                | 1     | AGAA    | 0.00034817       |
| 3     | TTAC    | 0.001490417      | 6     | TTAC    | 0.00208902       |
| 26    | TGTG    | 0.012916944      | 28    | TGTG    | 0.009748761      |
| 202   | TAGC    | 0.100354719      | 253   | TAGC    | 0.088087015      |
| 430   | ATCT    | 0.213626382      | 640   | ATCC    | 0.222828812      |
| 456   | ATCC    | 0.226543326      | 648   | ATCT    | 0.225614172      |
| 670   | CGCG    | 0.332859712      | 932   | GCTC    | 0.324494457      |
| 676   | GTCC    | 0.335840545      | 1011  | GTCC    | 0.351999889      |
| 704   | GCTC    | 0.3497511        | 1037  | CGCG    | 0.361052309      |
| 968   | GGTC    | 0.480907763      | 1557  | GGTC    | 0.542100719      |
| 1562  | CATG    | 0.776010254      | 1900  | CATG    | 0.661523035      |
| 2043  | TTAT    | 1.014973719      | 2729  | ACGC    | 0.95015598       |
| 2065  | ACGC    | 1.025903441      | 2859  | TTAT    | 0.995418083      |
| 2775  | GCAT    | 1.378635375      | 3304  | GCAT    | 1.150353741      |
| 3078  | CATA    | 1.529167453      | 4414  | CATA    | 1.536822461      |
| 3359  | ACTC    | 1.66876981       | 4642  | TGAG    | 1.616205225      |
| 3804  | TGAG    | 1.889848276      | 4893  | CGAC    | 1.7035959        |
| 3928  | CGAC    | 1.951452163      | 5173  | ACTC    | 1.801083505      |
| 3992  | CCTA    | 1.983247717      | 6240  | CCTA    | 2.172580915      |
| 4182  | TGAT    | 2.07764077       | 6295  | TGAT    | 2.191730266      |
| 4392  | GGAT    | 2.181969933      | 6382  | AATT    | 2.222021057      |
| 4693  | AATT    | 2.331508401      | 6398  | GGAT    | 2.227591778      |
| 4770  | TACT    | 2.369762428      | 6790  | TACT    | 2.364074425      |
| 5018  | TCGT    | 2.492970202      | 6832  | TCGT    | 2.378697566      |
| 5071  | TTAG    | 2.519300895      | 7257  | CAGT    | 2.526669823      |
| 5224  | CAGT    | 2.595312143      | 7372  | TTAG    | 2.566709376      |
| 5432  | CTAC    | 2.698647695      | 7533  | CAGC    | 2.622764748      |
| 5528  | ATTG    | 2.746341027      | 7810  | TCAG    | 2.719207844      |
| 5612  | CAGC    | 2.788072693      | 8164  | CTAC    | 2.84246003       |
| 5632  | TCAG    | 2.798008803      | 8347  | ATTG    | 2.906175143      |
| 6289  | ACTT    | 3.124410043      | 9124  | ACTT    | 3.176703248      |
| 7124  | GACA    | 3.53924267       | 9784  | CGTG    | 3.40649546       |
| 7224  | CGTG    | 3.588923224      | 10482 | GACA    | 3.649518133      |
| 7387  | TATC    | 3.669902527      | 11207 | TATC    | 3.901941396      |
| 8830  | CGTA    | 4.386792922      | 13844 | CGCA    | 4.820065734      |
| 9937  | CGCA    | 4.936756655      | 14073 | CGTA    | 4.899796669      |

|        |      |             |        |      |             |
|--------|------|-------------|--------|------|-------------|
| 10129  | TGTC | 5.032143318 | 14719  | TGTC | 5.124714501 |
| 10323  | CCAG | 5.128523593 | 15952  | CCAG | 5.554008133 |
| 14255  | CTAT | 7.081962978 | 19860  | CTAT | 6.914656565 |
| 16709  | GTAC | 8.301123774 | 21539  | GTAC | 7.499234026 |
| 16784  | TAGT | 8.33838419  | 25185  | TAGT | 8.768661913 |
| Total: |      |             | Total: |      |             |
| 201286 |      |             | 287216 |      |             |

Number of sequencing reads and representation (calculated as percentage of total reads) of all barcodes included in batch #1 in two independently processed samples of the same transduced cell pool (samples #4A and 4B). The samples were processed independently in all steps from gDNA extraction, barcode PCR and high-throughput sequencing.



**Supplementary Table 12. Primers and probes for chr7q copy number quantitation  
by qPCR**

| <b>Name</b> | <b>Sequence</b>                                         |
|-------------|---------------------------------------------------------|
| hALB-F      | TGA AAC ATA CGT TCC CAA AGA GTT T                       |
| hALB-R      | CTC TCC TTC TCA GAA AGT GTG CAT AT                      |
| hALB-P      | /56-JOEN/TGC TGA AAC ATT CAC CTT CCA TGC AGA /36-TAMSp/ |
| 7p14.3-F    | GCC TAC CAA CTA CCC TGT TT                              |
| 7p14.3-R    | TTC ATA GTG GGC CTT TGT ATC A                           |
| 7p14.3-P    | /56-FAM/TGA GAA ATT GGA GAG GGT GGG TGC /36-TAMSp/      |
| 7q11.22-F   | TCA CCG TAA GTG CTG TCA AC                              |
| 7q11.22-R   | CCT TAC ACA CCC AGA GAC AAT C                           |
| 7q11.22-P   | /56-FAM/TCG GAT GCC CAG CAA ACA TCT GTA /36-TAMSp/      |
| 7q21.12-F   | GAC AGC GTT TCC CTG TAA GT                              |
| 7q21.12-R   | GTG TCT GAC CCT GTG AGT ATT G                           |
| 7q21.12-P   | /56-FAM/AGA GAA GGT GGA ATG AAG CTC GCA /36-TAMSp/      |
| 7q31.2-F    | AGG AAA GTG GGT GAC TGG GTT TCA                         |
| 7q31.2-R    | TAG TGT TTG CTG GCA ATC CTT GGC                         |
| 7q31.2-P    | /56-FAM/TCC AAT CAG GAA AGG CAA GCC AAG GA/36-TAMSp/    |
| 7q35-F      | GAG ACC AAA GGA GAA GTG AAG G                           |
| 7q35-R      | CCT CCC AGC CCA ATG TAA TAG                             |
| 7q35-P      | /56-FAM/TAG AAT TGG CAG CAC AGG TGG AGG /36-TAMSp/      |

### Supplementary Table 13. Primers used for qRT-PCR

| Name       | Sequence                        |
|------------|---------------------------------|
| ADCK2-F    | ACC TCA TCT CCG TGG CAG TGA A   |
| ADCK2-R    | CCT CCA CAA TCT CAG GCA AGC T   |
| AGK-F      | GAG GTC TGG AAA GAT GTG CAG C   |
| AGK-R      | CTC CTT TGC TGA TGG TGT CAG G   |
| ATP6V0E2-F | ACC GCC GTC TGC TGT TAC CTC     |
| ATP6V0E2-R | AAG CGC ACG TAC CAG ATG GTC T   |
| EZH2-F     | GAC CTC TGT CTT ACT TGT GGA GC  |
| EZH2-R     | CGT CAG ATG GTG CCA GCA ATA G   |
| GALNT11-F  | TTG GGC TAC CAC AGA GAT GTG C   |
| GALNT11-R  | CAC TGT CCG AAG CAA GGC AGA A   |
| HIPK2-F    | AGC GTC ATC ACC ATC AGC AGT G   |
| HIPK2-R    | AGT CGT GGA CTG TGA CAC AGC T   |
| LUC7L2-F   | GGA GCA GAG AAC GAT CCA AGA G   |
| LUC7L2-R   | TCC GAT CTC TGT CAC GAG GTG A   |
| SSBP1-F    | CTG TCT TGA GAC AGG TGG AAG G   |
| SSBP1-R    | CTG TGC CAT GTT GTC TTT TGA CTG |
| ACTIN-F    | TGA AGT GTG ACG TGG ACA TC      |
| ACTIN-R    | GGA GGA GCA ATG ATC TTG AT      |

**Supplementary Table 14: shRNA and CRISPR gRNA sequences.**

| <b>Name</b>      | <b>Sequence</b>                |
|------------------|--------------------------------|
| shRNA-scramble   | CGA GGG CGA CTT AAC CTT AGG    |
| shRNA-HIPK2      | ATT GGG CTG GAT ACT GAC TCG    |
| shRNA1-ATP6V0E2  | TGA CCA GAC ATA GTT GTG TGG    |
| shRNA2- ATP6V0E2 | ATG AGC CAG AAG AGG TAA CAG    |
| shRNA-LUC7L2     | ATT CCG ATA AAC TTC CTC TGC    |
| shRNA1-EZH2      | TTT GGT CCC AAT TAA CCT AGC    |
| shRNA2-EZH2      | TAA TGG GAT GAC TTG TGT TGG    |
| gRNA-EZH2        | CTG AGA AGG GAC CAG TTT GTT GG |

The mature antisense shRNA sequences are given 5' to 3'.
